# Supplementary material
Source: PubMed Central journal article supplement (PMC8741639)
Supplement: NIHMS1740571-supplement-2.pdf [file NIHMS1740571-supplement-2.pdf]

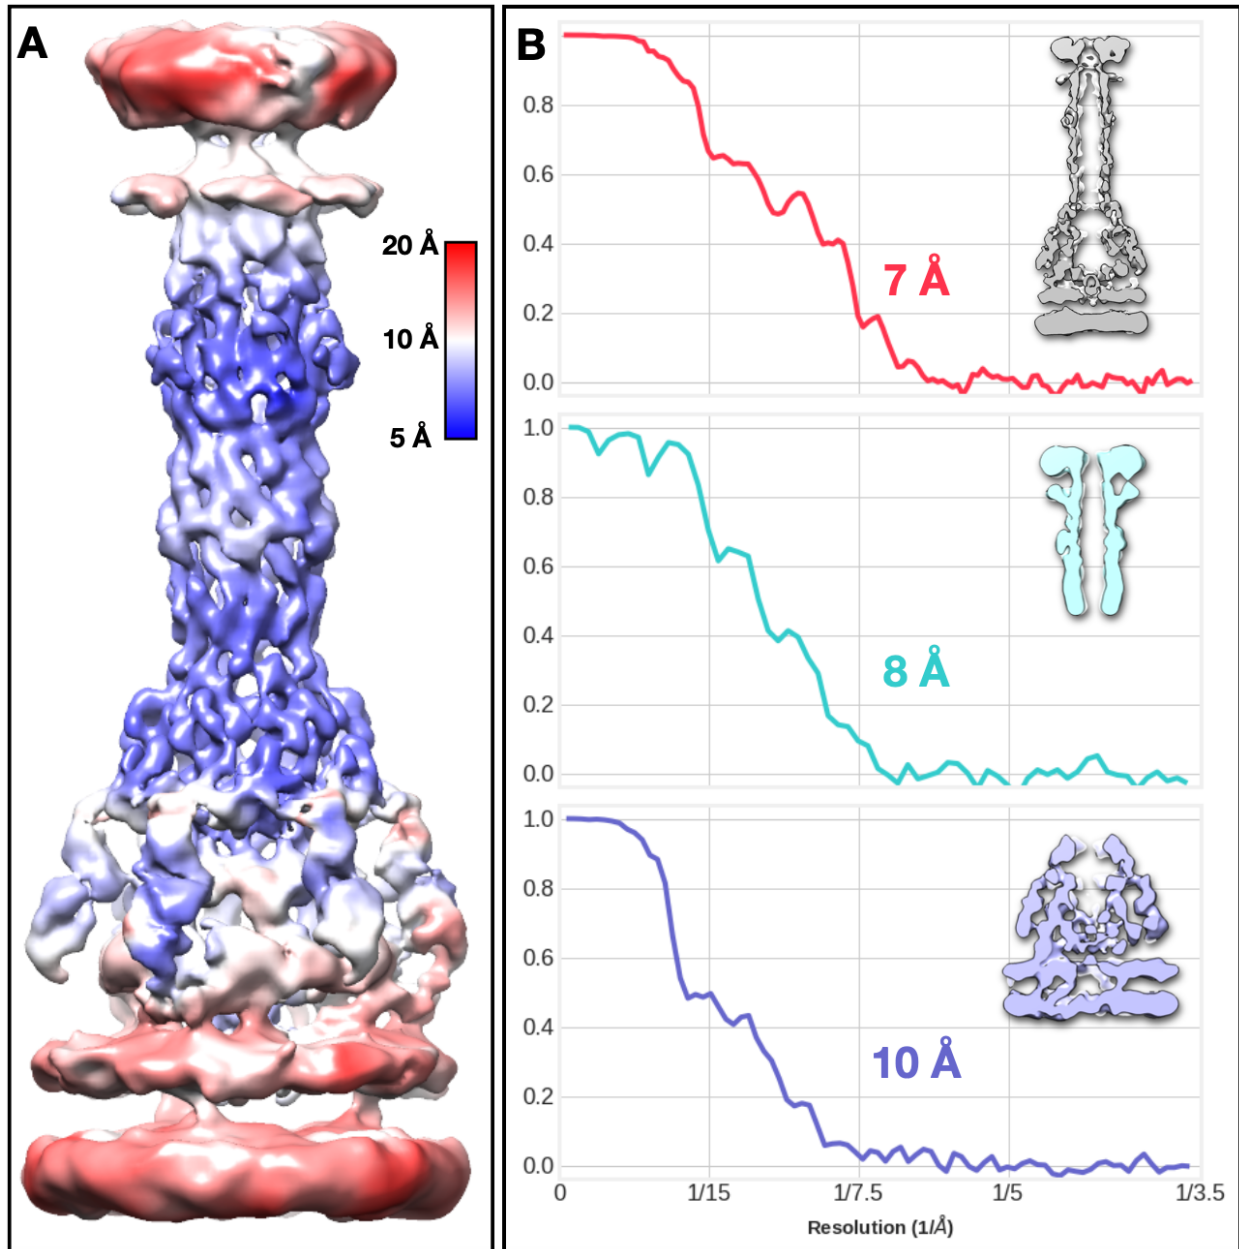

**Figure S1. Local resolution estimate of subtomogram averaging results, using windowed FSC. Related to Figure 2.**

(A) Averaged structure of the full pump colored by local resolution. (B) Fourier shell correlation plot of the full pump structure (7 Å, red); and the focused refinement results: TolC (8 Å, cyan); AcrB (10 Å, purple).

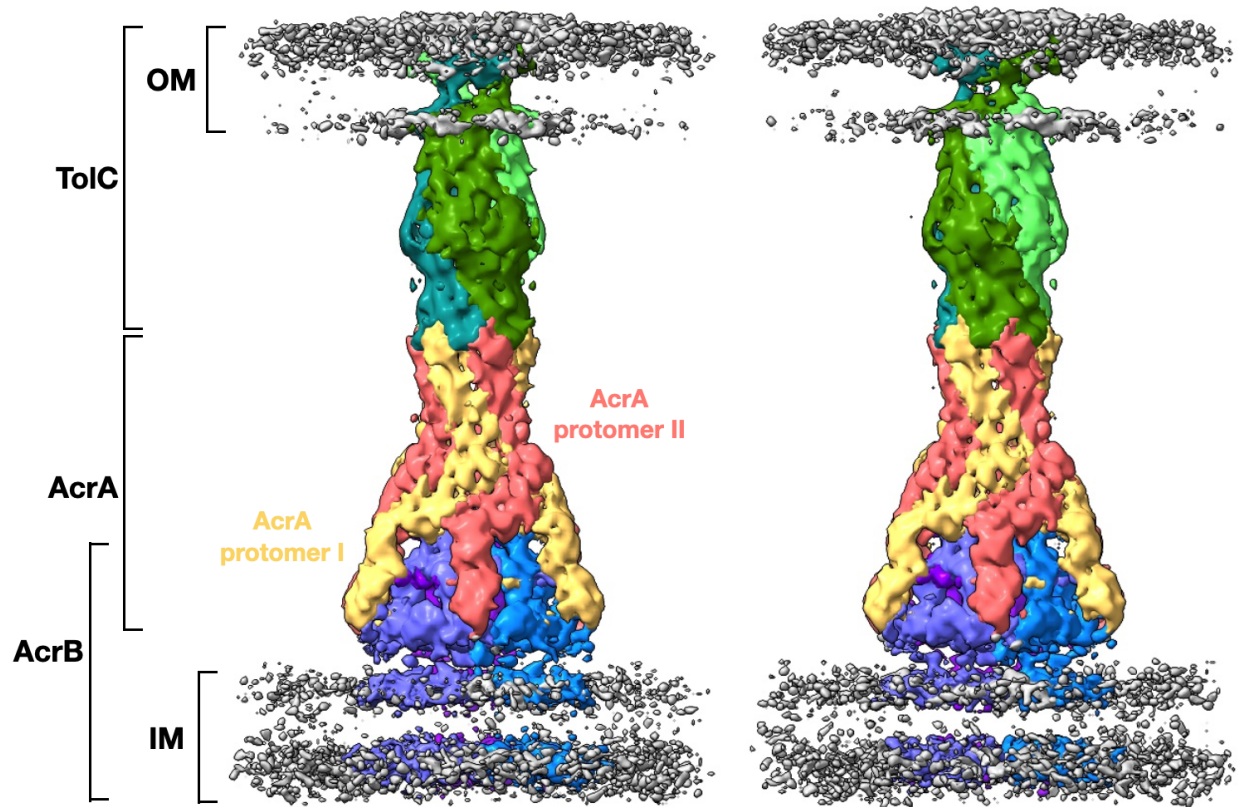

**Figure S2. The two density maps generated separately based on the classification of TolC, representing two assembly models of the AcrAB-TolC efflux pump. Related to Figure 2.**

Each of the TolC and AcrB protomers is colored uniquely. AcrA protomer I and protomer II are colored yellow and red, respectively. TolC has a 60-degree rotation relative to the AcrAB subcomplex between the two models. OM, outer membrane; IM, inner membrane.

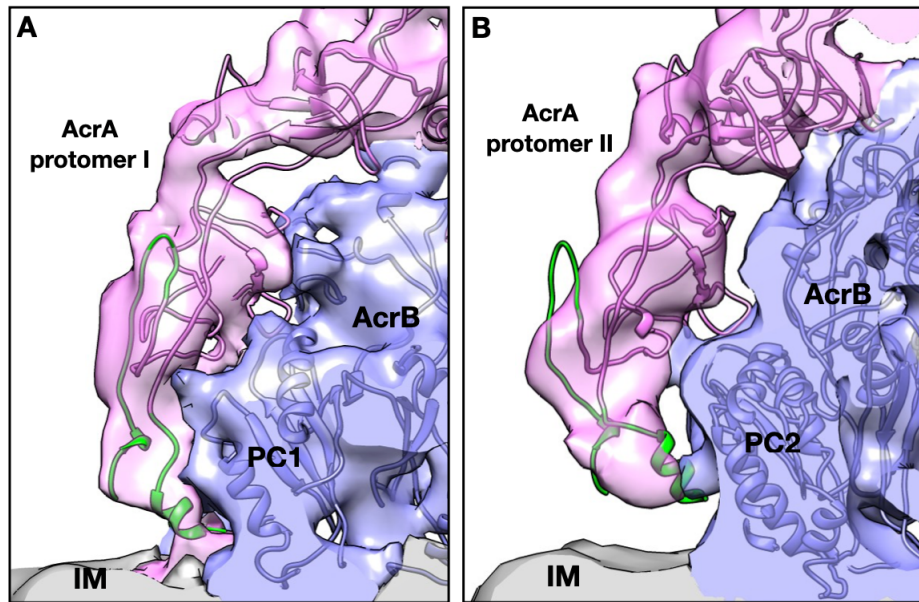

**Figure S3. Side view of the interactions between AcrA and AcrB. Related to Figure 3.**

(A) shows AcrA protomer I; and (B) shows AcrA protomer II. The *de novo* model for the AcrA termini colored green. IM, inner membrane.

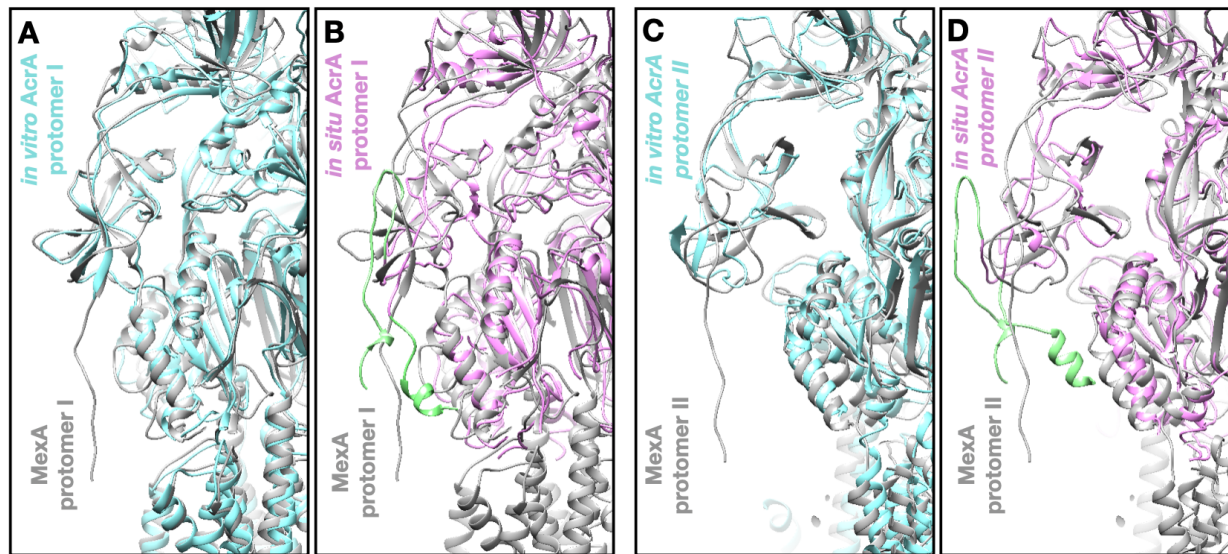

**Figure S4. Comparison of the cryo-EM structure of MexAB-OprM assembled on a nanodisc (6TA6) (grey), the cryo-EM structure of purified AcrAB-TolC (5O66) (cyan), and the *in situ* structure of AcrAB-TolC (this study) (pink). Related to Figure 4.**

From left to right are showing the superimpositions of MexA protomer I with *in vitro* AcrA protomer I (A), MexA protomer I with *in situ* AcrA protomer I (B), MexA protomer II with *in vitro* AcrA protomer II (C), and MexA protomer II with *in situ* AcrA protomer II (D).

**Table S1. List of TolC channel states and AcrAB subcomplex existence in different structural models from previous studies or this study. Related to Figure 2.**

| Environment     | Conformational state   | TolC state | AcrAB     | Source                 | Identifier |
|-----------------|------------------------|------------|-----------|------------------------|------------|
| <i>in vitro</i> | isolated TolC          | closed     | N/A       | Koronakis et al., 2000 | PDB: 1EK9  |
|                 | full pump+inhibitor    | open       | N/A       | Wang et al., 2017      | PDB: 5NG5  |
|                 | full pump+antibiotics  | open       | N/A       | Wang et al., 2017      | PDB: 5O66  |
|                 | crosslinked AcrAB-TolC | closed     | N/A       | Wang et al., 2017      | PDB: 5VS5  |
|                 | full pump apo state    | open       | N/A       | Du et al., 2014        | EMD-5915   |
| <i>In situ</i>  | full pump+inhibitor    | open       | Non-exist | This study             | This study |
|                 | full pump+antibiotics  | closed     | exist     | Shi et al., 2019       | EMD-0532   |

Inhibitor: MBX3132 (binds to AcrB and locks the pump in the transporting state); antibiotics: puromycin; crosslinked AcrAB-TolC: the full pump assembly stabilized through the disulfide-bond linked AcrAB, generated by introducing cysteine-substitutions (AcrA-S273C and AcrB-S258C).
